# Supplementary material for: La3+:Ni–Cl oxyhydroxide gels with enhanced electroactivity as positive materials for hybrid supercapacitors
Source: Royal Society of Chemistry journal article supplement (doi:10.1039/c9dt04410h), 2019-12-17
Supplement: c9dt04410h1.pdf [file c9dt04410h1.pdf]

## Supporting Information

### **La<sup>3+</sup>:Ni-Cl oxyhydroxide gels with enhanced electroactivity as positive materials for hybrid supercapacitors**

Kunfeng Chen<sup>1</sup>, Feng Liang<sup>2,3</sup>, and Dongfeng Xue<sup>1,\*</sup>

<sup>1</sup>State Key Laboratory of Rare Earth Resource Utilization, Changchun Institute of Applied Chemistry, Chinese Academy of Sciences, Changchun 130022, China

<sup>2</sup>Faculty of Metallurgical and Energy Engineering, Kunming University of Science and Technology, Kunming 650093, China

<sup>3</sup>State Key Laboratory of Complex Nonferrous Metal Resources Clean Utilization, Kunming University of Science and Technology, Kunming 650093, China

\*Corresponding author. E-mail: dongfeng@ciac.ac.cn

#### **Calculation equation of energy density and power density of hybrid supercapacitors:**

The specific energy density ( $E$ , Wh kg<sup>-1</sup>) and power density ( $P$ , W kg<sup>-1</sup>) for an asymmetric supercapacitor can be calculated using the following equations:

$$E = \frac{\int I \cdot V(t) dt}{3.6m}$$

$$P = \frac{3600E}{\Delta t}$$

where  $E$  (Wh kg<sup>-1</sup>) is the energy density,  $P$  (W kg<sup>-1</sup>) is the power density,  $I$  (A) is the discharge current,  $\int I \cdot V(t) dt$  is the area under the discharge curve,  $m$  (g) is the total mass of the active material (positive and negative electrodes), and  $\Delta t$  (s) is the discharge time.

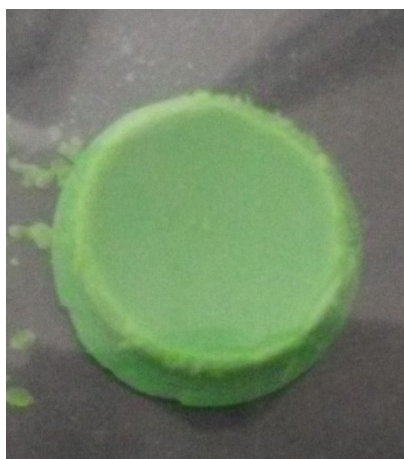

Fig. S1 Photo of  $\text{La}^{3+}$ :Ni-Cl oxyhydroxide gels.

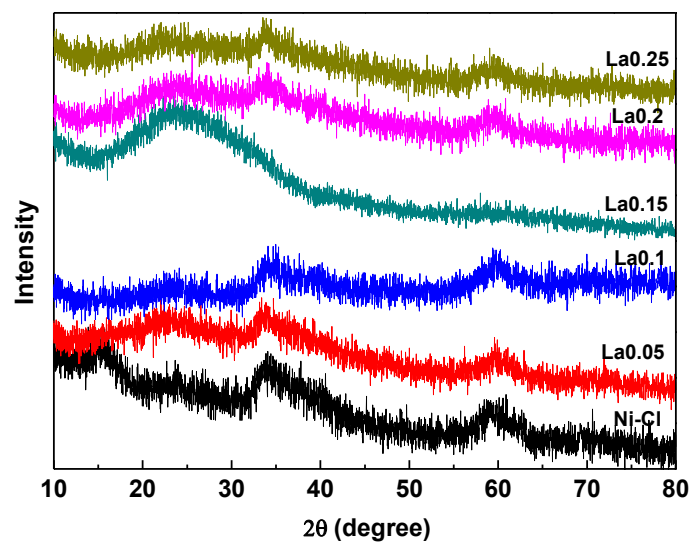

Fig. S2 XRD patterns of Ni-Cl oxyhydroxide and La<sup>3+</sup>:Ni-Cl oxyhydroxide gels with adding different amount of La<sup>3+</sup>.

Table S1 Elemental ratios calculated based on EDS analysis of Ni-Cl oxyhydroxide gels with different La<sup>3+</sup> amounts before and after electrochemical test.

| Sample | As-obtained sample |            |            | After electrochemical test |            |            |
|--------|--------------------|------------|------------|----------------------------|------------|------------|
|        | La/Ni              | La/(Ni+La) | Cl/(Ni+La) | La/Ni                      | La/(Ni+La) | Cl/(Ni+La) |
| Ni     | /                  | /          | 0.35       | /                          | /          | 0.022      |
| La0.05 | 0.020              | 0.022      | 0.29       | 0.031                      | 0.030      | 0.019      |
| La0.10 | 0.050              | 0.048      | 0.30       | 0.044                      | 0.042      | 0.019      |
| La0.15 | 0.072              | 0.067      | 0.23       | 0.074                      | 0.069      | 0.023      |
| La0.20 | 0.136              | 0.120      | 0.26       | 0.081                      | 0.075      | 0.038      |
| La0.25 | 0.125              | 0.111      | 0.25       | 0.113                      | 0.102      | 0.043      |

Table S2 Element ratios of Ni-Cl oxyhydroxide gels with different La<sup>3+</sup> amounts from EDS before electrochemical test.

| Sample | Ni    | O     | Cl   | C     | La    | La/Ni | La/(Ni+La) | Cl/(Ni+La) |
|--------|-------|-------|------|-------|-------|-------|------------|------------|
| Ni     | 18.58 | 48.81 | 6.56 | 26.05 | -     | -     | -          | 0.35       |
| La0.05 | 4.16  | 43.12 | 1.25 | 51.48 | 0.092 | 0.02  | 0.022      | 0.29       |
| La0.1  | 26.16 | 45.9  | 8.36 | 18.26 | 1.31  | 0.050 | 0.048      | 0.30       |
| La0.15 | 27.62 | 42.73 | 6.84 | 20.83 | 1.98  | 0.072 | 0.067      | 0.23       |
| La0.2  | 14.67 | 43.51 | 4.26 | 35.57 | 2     | 0.136 | 0.120      | 0.26       |
| La0.25 | 14.53 | 59.05 | 4.12 | 20.48 | 1.82  | 0.125 | 0.111      | 0.25       |

Table S3 Element ratios of Ni-Cl oxyhydroxide gels with different La<sup>3+</sup> amounts from EDS after electrochemical test.

| Sample | Ni    | La   | Cl   | K     | O     | La/Ni | La/(Ni+La) | Cl/(Ni+La) |
|--------|-------|------|------|-------|-------|-------|------------|------------|
| Ni     | 16.08 | 0    | 0.35 | 13.05 | 39.44 | -     | -          | 0.022      |
| La0.05 | 19.77 | 0.61 | 0.39 | 8.12  | 48.32 | 0.031 | 0.030      | 0.019      |
| La0.1  | 19.24 | 0.84 | 0.39 | 9.77  | 42.44 | 0.044 | 0.042      | 0.019      |
| La0.15 | 15.85 | 1.17 | 0.39 | 5.78  | 39.92 | 0.074 | 0.069      | 0.023      |
| La0.2  | 15.76 | 1.28 | 0.64 | 14.07 | 47.22 | 0.081 | 0.075      | 0.038      |
| La0.25 | 11.59 | 1.31 | 0.56 | 7.81  | 54.40 | 0.113 | 0.102      | 0.043      |

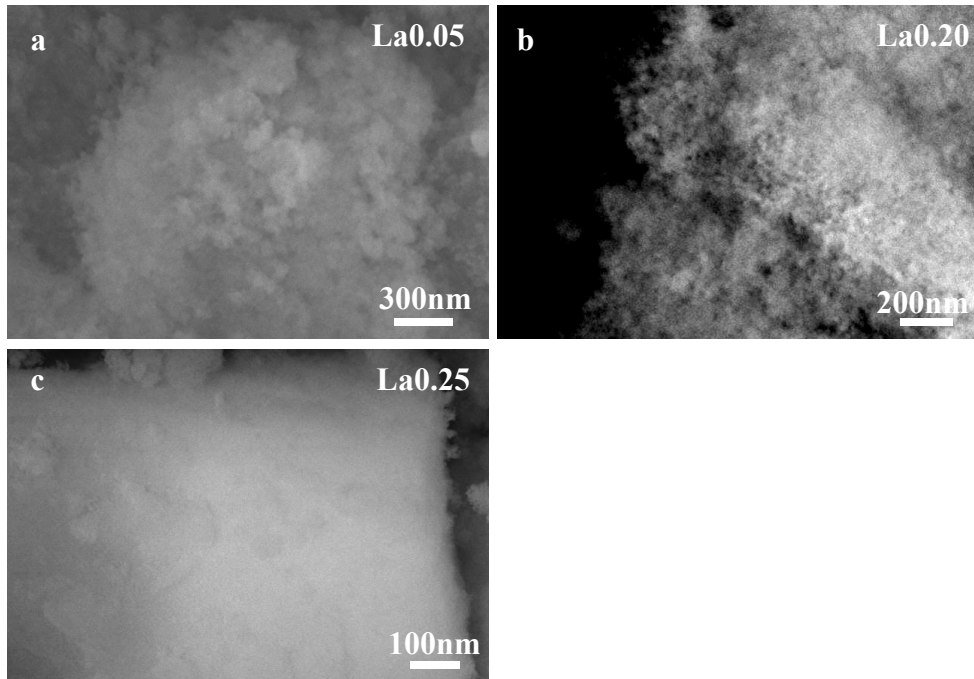

Fig. S3 SEM images of Ni-Cl oxyhydroxide and La<sup>3+</sup>:Ni-Cl oxyhydroxide gels with adding different amount of La<sup>3+</sup>: (a) 0.05 mmol, (b) 0.20 mmol, (a) 0.25mmol,

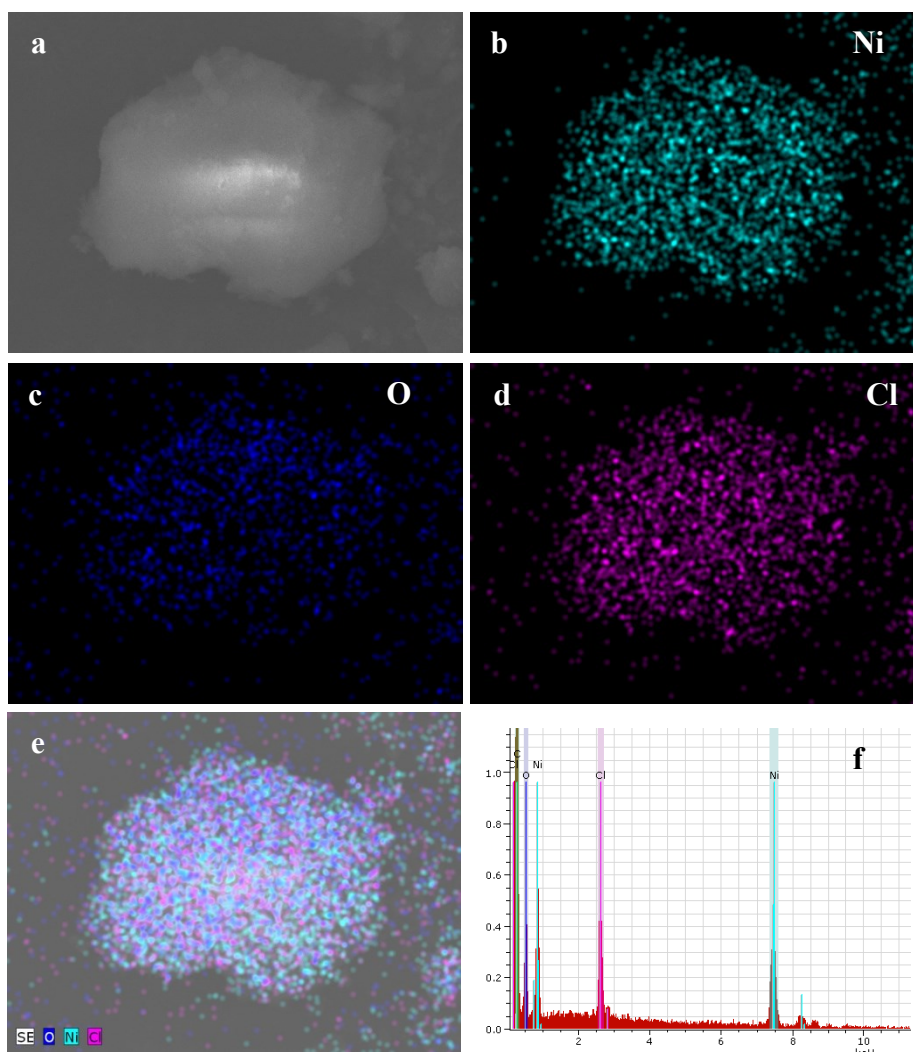

Fig. S4 SEM image (a), element mapping (b-e) and EDS (f) of Ni-Cl oxyhydroxide gels.

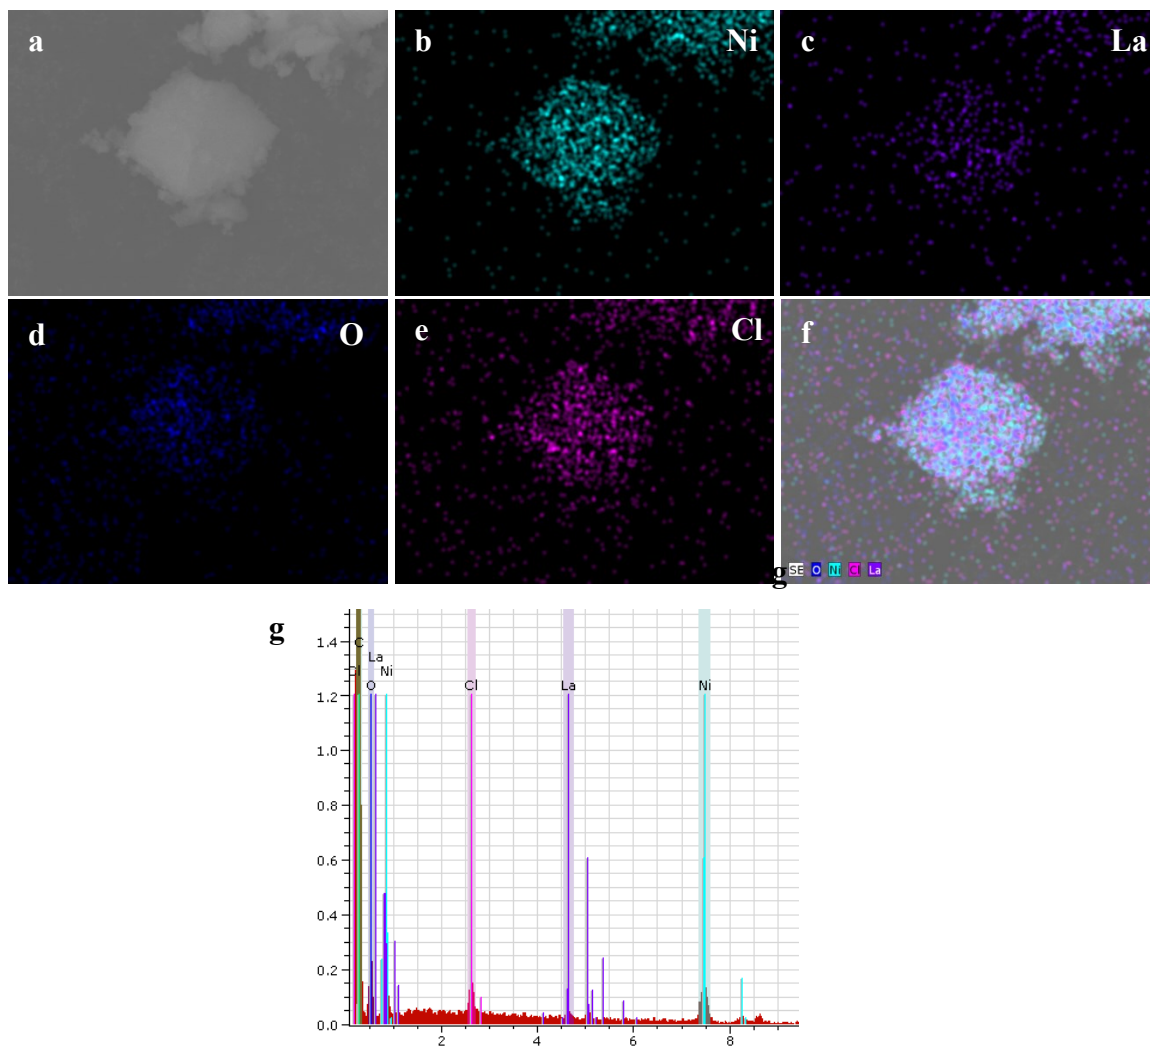

Fig. S5 SEM image (a), element mapping (b-f) and EDS (g) of La<sup>3+</sup>:Ni-Cl oxyhydroxides (La<sub>0.15</sub>).

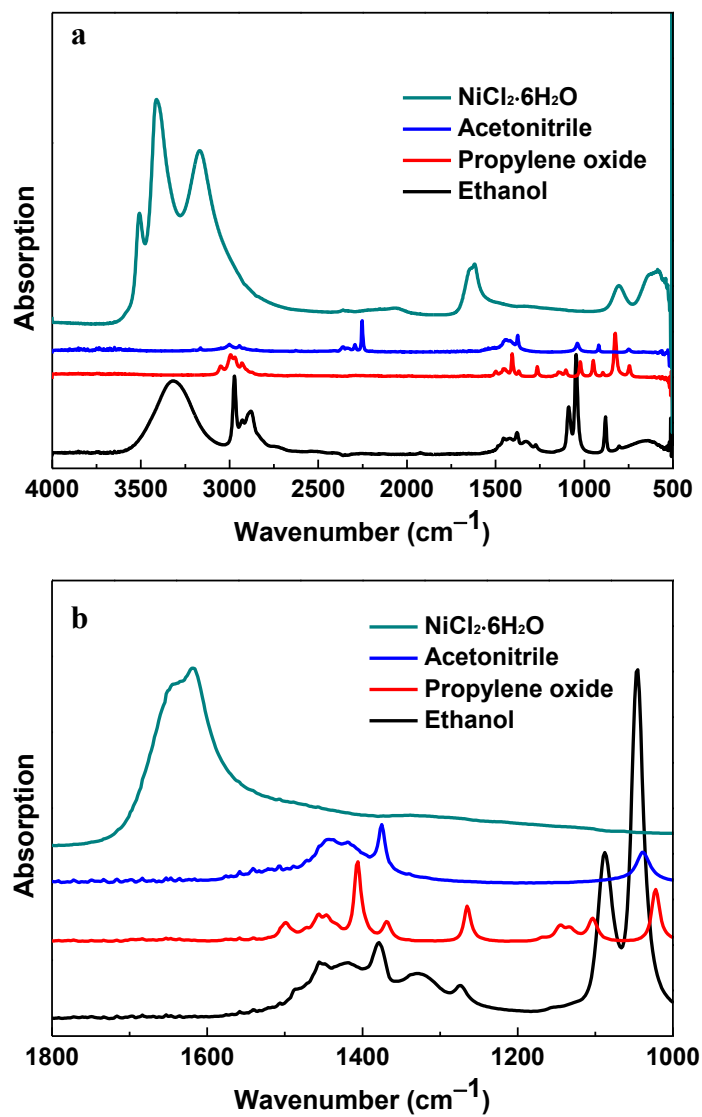

Fig. S6. (a and b) FTIR spectra of ethonal, propylene oxide, acetonitrile, and NiCl<sub>2</sub>·6H<sub>2</sub>O.



Table S4 Compare of energy densities and power densities of hybrid supercapacitors reported in literatures

| Supercapacitors                                                                            | Potential window | Power density            | Energy density           | Ref.      |
|--------------------------------------------------------------------------------------------|------------------|--------------------------|--------------------------|-----------|
| 3D-ICHA<br>a-Ni(OH) <sub>2</sub> //AC                                                      | 1.55V            | 0.14 kW/kg<br>2.9 kW/kg  | 14.8 Wh/kg<br>9.0 Wh/kg  | 1         |
| Ni foam-supported<br>Ni <sub>2</sub> P nanosheet//AC                                       | 1.4V             | 0.34 kW/kg<br>5.3 kW/kg  | 26.0 Wh/kg<br>10.0 Wh/kg | 2         |
| Ni(OH) <sub>2</sub> /graphene //<br>porous graphene                                        | 1.6V             | 0.17 kW/kg               | 77.8 Wh/kg               | 3         |
| Ni(OH) <sub>2</sub> -Co <sub>2</sub> (OH) <sub>3</sub> Cl<br>bilayer<br>nanocomposites//AC | 1.7 V            | 0.26 kW/kg<br>4.2 kW/kg  | 37.6 Wh/kg<br>20.0 Wh/kg | 4         |
| CNT/Ni(OH) <sub>2</sub> //RGO                                                              | 1.8 V            | 1.8 kW/kg<br>2.7 kW/kg   | 35.0 Wh/kg<br>26.2 Wh/kg | 5         |
| Co <sub>3</sub> O <sub>4</sub> @Ni(OH) <sub>2</sub> //AC                                   | 1.65V            | 0.033W/kg<br>1.7 kW/kg   | 41.8 Wh/kg<br>18.4 Wh/kg | 6         |
| Co <sub>3</sub> O <sub>4</sub> @Ni(OH) <sub>2</sub> //RGO                                  | 1.65V            | 0.036 kW/kg<br>1.9 kW/kg | 41.9 Wh/kg<br>18.5 Wh/kg | 6         |
| La <sup>3+</sup> :Ni-Cl<br>oxyhydroxide gel<br>(La0.05)//AC                                | 1.5V             | 1.0 kW/kg<br>13.9 kW/kg  | 30.7 Wh/kg<br>13.9 Wh/kg | This work |

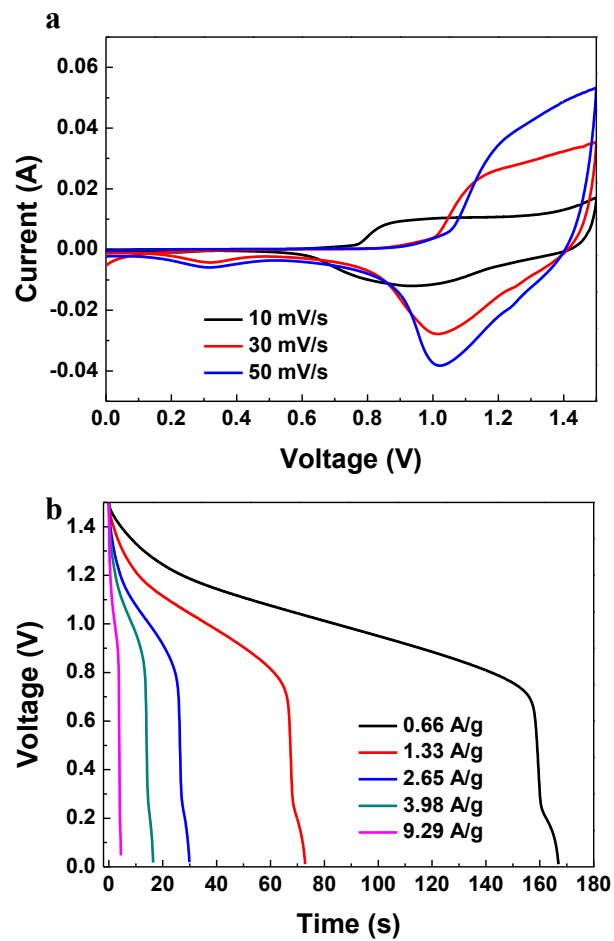

Fig. S7 (a) CV curves at different scan rates and (b) discharge curves of Ni-Cl oxyhydroxide//AC.

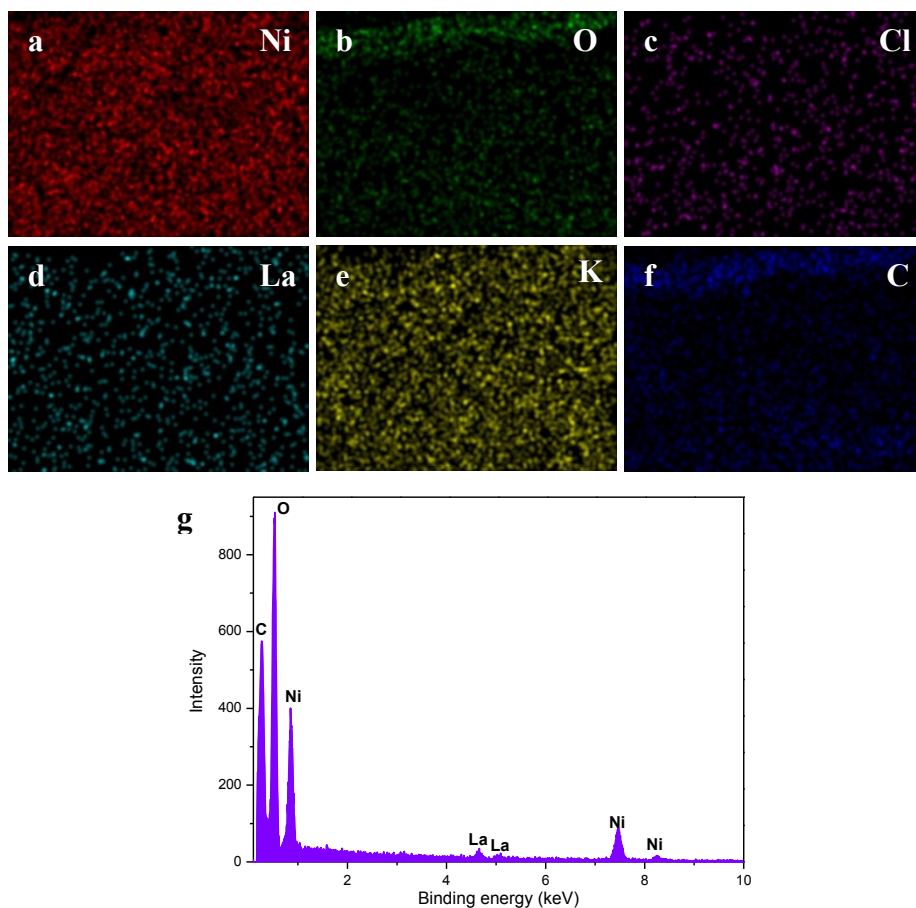

Fig. S8 Elemental mapping of  $\text{La}^{3+}$ :Ni-Cl oxyhydroxide gel (La0.10) electrode after electrochemical testing.

References:

- 1 C. D. Gu, X. Ge, X. L. Wang, J. P. Tu, *J. Mater. Chem. A*, 2015, **3**, 14228-14238.
- 2 K. Zhou, W. Zhou, L. Yang, J. Lu, S. Cheng, W. Mai, Z. Tang, L. Li, S. Chen, *Adv. Funct. Mater.*, 2015, **25**, 7530–7538.
- 3 J. Yan, Z. Fan, W. Sun, G. Ning, T. Wei, Q. Zhang, R. Zhang, L. Zhi, F. Wei, *Adv. Funct. Mater.*, 2012, **22**, 2632–2641.
- 4 Z. Zhang, W. Dua, X. Ren, Z. Shen, X. Fan, S. Wei, C. Wei, Z. Cao, B. Zhang, *Appl. Surf. Sci.*, 2019, **469**, 624–633.
- 5 R. R. Salunkhe, J. Lin, V. Malgras, S. Dou, J. Kim, Y. Yamauchi, *Nano Energy*, 2015, **11**, 211-218.
- 6 C. Tang, X. Yin, H. Gong, *ACS Appl. Mater. Interfaces*, 2013, **5**, 10574-10582.
